# Supplementary material
Source: PubMed Central journal article supplement (PMC4133086)
Supplement: NIHMS612061-supplement-Material_list.pdf [file NIHMS612061-supplement-Material_list.pdf]

Materials List for:

# Reconstitution Of $\beta$ -catenin Degradation In *Xenopus* Egg Extract

Tony W. Chen<sup>\*1</sup>, Matthew R. Broadus<sup>\*1</sup>, Stacey S. Huppert<sup>2</sup>, Ethan Lee<sup>1,3</sup>

<sup>1</sup>Department of Cell and Developmental Biology and Program in Developmental Biology, Vanderbilt University Medical Center

<sup>2</sup>Division of Gastroenterology, Hepatology & Nutrition and Division of Developmental Biology, Cincinnati Children's Hospital Medical Center

<sup>3</sup>Vanderbilt Ingram Cancer Center, Vanderbilt University School of Medicine

\*These authors contributed equally

Correspondence to: Ethan Lee at [ethan.lee@vanderbilt.edu](mailto:ethan.lee@vanderbilt.edu)

URL: <http://www.jove.com/video/51425>

DOI: [doi:10.3791/51425](https://doi.org/10.3791/51425)

## Materials

| Name                                                       | Company                         | Catalog Number                                                                            | Comments                                                         |
|------------------------------------------------------------|---------------------------------|-------------------------------------------------------------------------------------------|------------------------------------------------------------------|
| Pregnant mare serum gonadotropin (PMSG)                    | ProSpec                         | hor-272-A                                                                                 | Reconstituted with distilled water before use.                   |
| Human chorionic gonadotropin                               | Sigma                           | CG10-10VL                                                                                 |                                                                  |
| Potassium chloride                                         | Fisher                          | BP366-1                                                                                   |                                                                  |
| Sodium chloride                                            | Research Products International | S23020-5000.0                                                                             |                                                                  |
| Magnesium chloride                                         | Fisher                          | BP214-500                                                                                 |                                                                  |
| Calcium chloride                                           | Acros Organics                  | AC42352-5000                                                                              |                                                                  |
| HEPES                                                      | Fisher                          | BP310-1                                                                                   |                                                                  |
| Cysteine                                                   | Acros Organics                  | AC17360-1000                                                                              |                                                                  |
| Leupeptin                                                  | Sigma                           | L2884-10MG                                                                                |                                                                  |
| Aprotinin                                                  | Sigma                           | A1153-10MG                                                                                |                                                                  |
| Pepstatin                                                  | Sigma                           | P4265-5MG                                                                                 |                                                                  |
| Cytochalasin B                                             | Sigma                           | C8273-10MG                                                                                |                                                                  |
| 3 ml syringe: Luer Lock tip                                | Becton Dickinson                | 309657                                                                                    |                                                                  |
| 27 G needle                                                | Becton Dickinson                | 305109                                                                                    |                                                                  |
| 96 well solid white polystyrene microplate, round bottomed | Corning                         | 3605                                                                                      |                                                                  |
| Steady-Glo luciferase assay system                         | Promega                         | E2520                                                                                     | Store long-term at -80 °C, can store for up to 1 month at -20 °C |
| TNT Sp6 coupled reticulocyte lysate system                 | Promega                         |  L4600 |                                                                  |
| TNT Sp6 high-yield wheat germ protein expression system    | Promega                         |  L3260 | Generally higher yield than reticulocyte lysate                  |
| EasyTag Express protein labeling mix [S35]                 | Perkin Elmer                    | NEG772007MC                                                                               |                                                                  |
| Creatine phosphate                                         | Sigma                           | 27920-5G                                                                                  |                                                                  |
| ATP                                                        | Sigma                           | A2383-5G                                                                                  |                                                                  |
| Creatine phosphokinase                                     | Sigma                           | C3755-35KU                                                                                |                                                                  |
| Dimethyl sulfoxide (DMSO)                                  | Sigma                           | D8418-50ML                                                                                |                                                                  |
| Dual-Glo luciferase assay system                           | Promega                         | E2920                                                                                     | Same storage conditions as Steady-Glo                            |
| 50 ml Centrifuge tubes                                     | Fisher Scientific               | 0556214D                                                                                  |                                                                  |
| Sorvall SS-34 fixed angle rotor                            | Thermo Scientific               | 28020                                                                                     |                                                                  |
| 115 V 50/60 Hz Minicentrifuge                              | Fisher Scientific               | 05-090-128                                                                                |                                                                  |
| mMessage mMachine Sp6 kit                                  | Ambion                          | AM1340                                                                                    |                                                                  |

|                                  |                              |                                                                                                           |  |
|----------------------------------|------------------------------|-----------------------------------------------------------------------------------------------------------|--|
| Anti-firefly luciferase antibody | Abcam                        |  <a href="#">ab16466</a> |  |
| Anti-GSK3 antibody               | BD Transduction Laboratories | 610201                                                                                                    |  |
| FLUOStar Optima                  | BMG Labtech                  |                                                                                                           |  |
| Sorvall RC-6 Plus centrifuge     | Thermo Scientific            |                                                                                                           |  |
| 16 °C Incubator                  | Percival Scientific          |                                                                                                           |  |
